# Supplementary material for: Prognostic Factors for Return to Sport After High Tibial Osteotomy: A Directed Acyclic Graph Approach
Source: PubMed Central journal article supplement — Am J Sports Med. 2019 Jun 3;47(8):1854–62. doi: 10.1177/0363546519849476 (PMC6604251; doi:10.1177/0363546519849476), 2019-06-03
Supplement: DS_10.1177_0363546519849476.pdf [file DS_10.1177_0363546519849476.pdf]

**Appendix Table A1** Low-, intermediate- and high-impact sports activities included in the questionnaire and the total number of participants for each sport at four time points

| Level of impact | Sport                     | Pre-symptomatic | 1 year preoperatively | 1 year postoperatively | At final FU |
|-----------------|---------------------------|-----------------|-----------------------|------------------------|-------------|
| Low             | Nordic walking            | 10              | 6                     | 5                      | 7           |
| Low             | Cycling                   | 188             | 144                   | 137                    | 185         |
| Low             | Bike racing               | 55              | 29                    | 33                     | 43          |
| Low             | Swimming                  | 110             | 69                    | 70                     | 86          |
| Low             | Aqua aerobics             | 8               | 6                     | 6                      | 3           |
| Low             | Cross-country skiing      | 14              | 3                     | 2                      | 4           |
| Low             | Golf                      | 28              | 20                    | 23                     | 27          |
| Low             | Table tennis              | 19              | 7                     | 4                      | 7           |
| Low             | Dancing                   | 48              | 14                    | 11                     | 10          |
| Low             | Sailing                   | 22              | 12                    | 10                     | 14          |
| Low             | Rowing                    | 12              | 4                     | 5                      | 9           |
| Intermediate    | Inline skating            | 18              | 2                     | 1                      | 3           |
| Intermediate    | Hiking                    | 66              | 29                    | 24                     | 34          |
| Intermediate    | Mountain climbing         | 16              | 2                     | 0                      | 6           |
| Intermediate    | Mountain biking           | 37              | 15                    | 13                     | 25          |
| Intermediate    | Fitness-/ weight-training | 117             | 73                    | 80                     | 88          |
| Intermediate    | Aerobics                  | 24              | 4                     | 2                      | 5           |
| Intermediate    | Gymnastics                | 20              | 2                     | 1                      | 2           |
| Intermediate    | Downhill skiing           | 80              | 41                    | 33                     | 37          |
| Intermediate    | Snowboarding              | 9               | 6                     | 2                      | 3           |
| Intermediate    | Ice skating               | 87              | 16                    | 6                      | 13          |
| Intermediate    | Tennis (doubles)          | 62              | 30                    | 17                     | 21          |
| Intermediate    | Horseback riding          | 18              | 5                     | 5                      | 5           |
| High            | Jogging                   | 103             | 31                    | 17                     | 28          |
| High            | Ice hockey                | 2               | 0                     | 0                      | 0           |
| High            | Tennis (singles)          | 78              | 25                    | 9                      | 13          |
| High            | Squash                    | 34              | 7                     | 3                      | 1           |
| High            | Badminton                 | 25              | 11                    | 6                      | 5           |
| High            | Soccer                    | 70              | 14                    | 8                      | 10          |
| High            | Handball                  | 17              | 2                     | 0                      | 1           |
| High            | Volleyball                | 37              | 5                     | 4                      | 3           |
| High            | Baseball                  | 7               | 1                     | 1                      | 0           |
| High            | Martial arts              | 24              | 5                     | 3                      | 7           |
| High            | Water skiing              | 8               | 0                     | 0                      | 1           |
| High            | Basketball                | 12              | 1                     | 0                      | 2           |
| High            | Field hockey              | 7               | 2                     | 3                      | 3           |
| High            | Rugby                     | 3               | 1                     | 0                      | 0           |

\*Level of impact according to Vail et al.<sup>29</sup>
